# Supplementary material for: Dabsylated Bradykinin Is Cleaved by Snake Venom Proteases from Echis ocellatus
Source: MDPI journal article supplement (doi:10.3390/biomedicines12051027), 2024-05-07
Supplement: s1 [file s1]

## Article

# Dabsylated Bradykinin is Cleaved by Snake Venom Proteases from *Echis ocellatus*

Julius Abiola <sup>1,2</sup>, Anna Maria Berg <sup>1</sup>, Olapeju Aiyelaagbe <sup>2</sup>, Akindele Adeyi <sup>3</sup>, and Simone König <sup>1\*</sup>

<sup>1</sup> IZKF Core Unit Proteomics, Interdisciplinary Center for Clinical Research, University of Münster, Röntgenstr. 21, 48149 Münster, Germany; koenigs@uni-muenster.de (S.K.)

<sup>2</sup> Organic Unit, Department of Chemistry, University of Ibadan, Ibadan, Nigeria; abiolaajulius005@gmail.com (J.A.), oaiyelaagbe@gmail.com (O.A.)

<sup>3</sup> Animal Physiology Unit, Department of Zoology, University of Ibadan, Ibadan, Nigeria; delegenius@yahoo.com (A.A.)

\* Correspondence: koenigs@uni-muenster.de; Tel.: +49 251 8357164

**Citation:** To be added by editorial staff during production.

Received: date

Revised: date

Accepted: date

Published: date

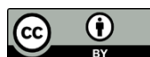

**Copyright:** © 2023 by the authors.

Submitted for possible open access publication under the terms and conditions of the Creative Commons Attribution (CC BY) license (<https://creativecommons.org/licenses/by/4.0/>).

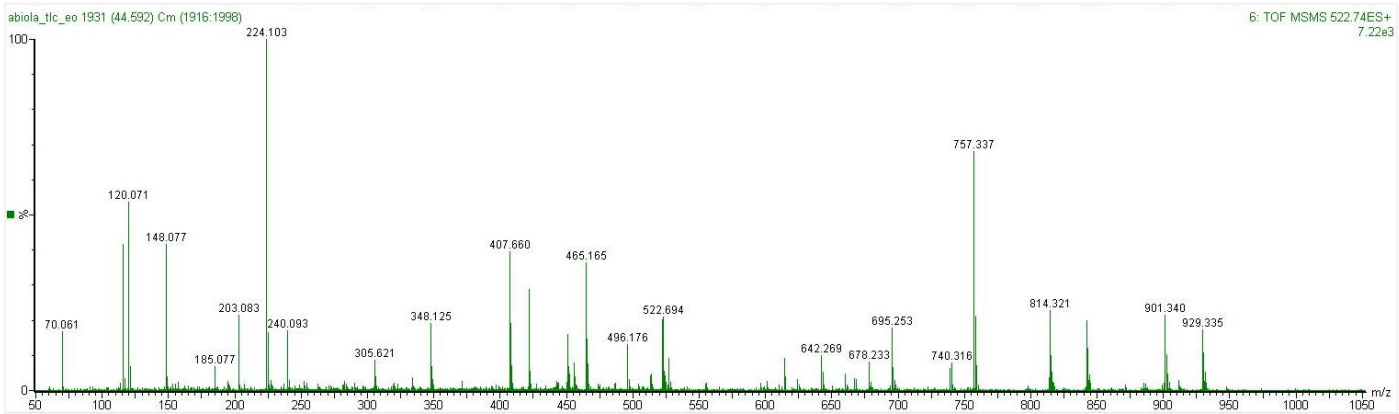

Average Mass = 1044.2021, Monoisotopic Mass = 1043.4647  
Residues: 1-7  
N-Terminus = dab, C-Terminus = OH  
Fragment ions: Monoisotopic/Average (5000) m/z ratios with 1 positive charge(s).

|    |         |         |         |         |         |         |         |
|----|---------|---------|---------|---------|---------|---------|---------|
| b  | 444.182 | 541.235 | 638.287 | 695.309 | 842.377 | 929.409 | -       |
| i  | 129.114 | 70.066  | 70.066  | 30.034  | 120.081 | 60.045  | 70.066  |
| b~ | 426.171 | 523.224 | 620.277 | 677.298 | 824.367 | 911.399 | -       |
| b* | 427.155 | 524.208 | 621.261 | 678.282 | 825.351 | 912.383 | -       |
|    | 1       | 2       | 3       | 4       | 5       | 6       | 7       |
|    | Arg     | Pro     | Pro     | Gly     | Phe     | Ser     | Pro     |
|    | 7       | 6       | 5       | 4       | 3       | 2       | 1       |
| y* | -       | 601.299 | 504.246 | 407.193 | 350.172 | 203.103 | 116.071 |
| y~ | -       | 583.288 | 486.235 | 389.182 | 332.161 | 185.093 | 98.061  |
| y* | -       | 584.272 | 487.219 | 390.166 | 333.145 | 186.077 | 99.045  |

Figure S1. Spectrum for DBK1-7 measured after DBK digestion by venom of *E. ocellatus*. Theoretical peptide fragment ions calculated using Masslynx software (Waters Corp.) for this peptide.

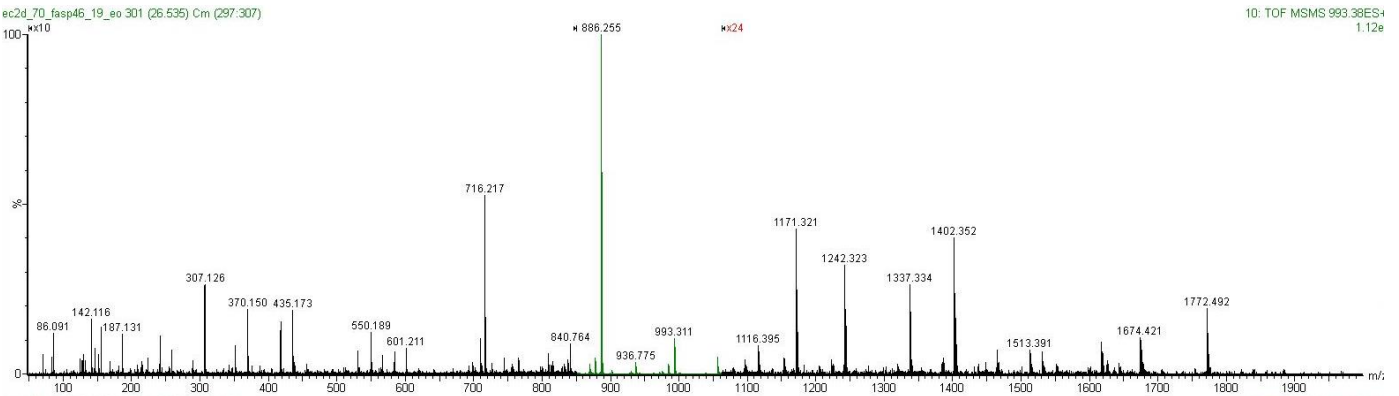

Average Mass = 1986.1733, Monoisotopic Mass = 1984.7381  
Residues: 1-17  
N-Terminus = H, C-Terminus = OH  
Fragment ions: Monoisotopic/Average (5000) m/z ratios with 1 positive charge(s).

|    |         |          |          |          |          |          |          |          |          |          |          |          |          |          |          |          |         |
|----|---------|----------|----------|----------|----------|----------|----------|----------|----------|----------|----------|----------|----------|----------|----------|----------|---------|
| b  | 114.092 | 215.140  | 312.192  | 369.214  | 456.246  | 584.304  | 744.335  | 815.372  | 930.399  | 987.420  | 1116.463 | 1276.494 | 1436.524 | 1551.551 | 1679.610 | 1839.640 | -       |
| i  | 86.097  | 74.061   | 70.066   | 30.034   | 60.045   | 101.071  | 133.044  | 44.050   | 88.040   | 30.034   | 102.056  | 133.044  | 133.044  | 88.040   | 101.071  | 133.044  | 101.108 |
| b~ | 96.081  | 197.129  | 294.182  | 351.203  | 438.235  | 566.294  | 726.324  | 797.362  | 912.388  | 969.410  | 1098.453 | 1258.483 | 1418.514 | 1533.541 | 1661.599 | 1821.630 | -       |
| b* | 97.065  | 198.113  | 295.166  | 352.187  | 439.219  | 567.278  | 727.308  | 798.346  | 913.372  | 970.394  | 1099.437 | 1259.467 | 1419.498 | 1534.525 | 1662.583 | 1822.614 | -       |
|    | 1       | 2        | 3        | 4        | 5        | 6        | 7        | 8        | 9        | 10       | 11       | 12       | 13       | 14       | 15       | 16       | 17      |
|    | Leu     | Thr      | Pro      | Gly      | Ser      | Gln      | CAM      | Ala      | Asp      | Gly      | Glu      | CAM      | CAM      | Asp      | Gln      | CAM      | Lys     |
|    | 17      | 16       | 15       | 14       | 13       | 12       | 11       | 10       | 9        | 8        | 7        | 6        | 5        | 4        | 3        | 2        | 1       |
| y* | -       | 1872.662 | 1771.614 | 1674.561 | 1617.540 | 1530.508 | 1402.449 | 1242.419 | 1171.382 | 1056.355 | 999.333  | 870.291  | 710.260  | 550.229  | 435.202  | 307.144  | 147.113 |
| y~ | -       | 1854.651 | 1753.604 | 1656.551 | 1599.529 | 1512.497 | 1384.439 | 1224.408 | 1153.371 | 1038.344 | 981.323  | 852.280  | 692.249  | 532.219  | 417.192  | 289.133  | 129.103 |
| y* | -       | 1855.635 | 1754.588 | 1657.535 | 1600.513 | 1513.481 | 1385.423 | 1225.392 | 1154.355 | 1039.328 | 982.307  | 853.264  | 693.233  | 533.203  | 418.176  | 290.117  | 130.087 |

Figure S2. Fragment ion spectra and theoretical peptide fragment ions calculated using Masslynx software (Waters Corp.) for peptide measured in *E. ocellatus* venom digest using target MS/MS of the doubly-charged precursor. Match from zinc metalloproteinase-disintegrin-like protein H3, *Vipera ammodytes ammodytes*, R4NNL0. Note zoom ranges.

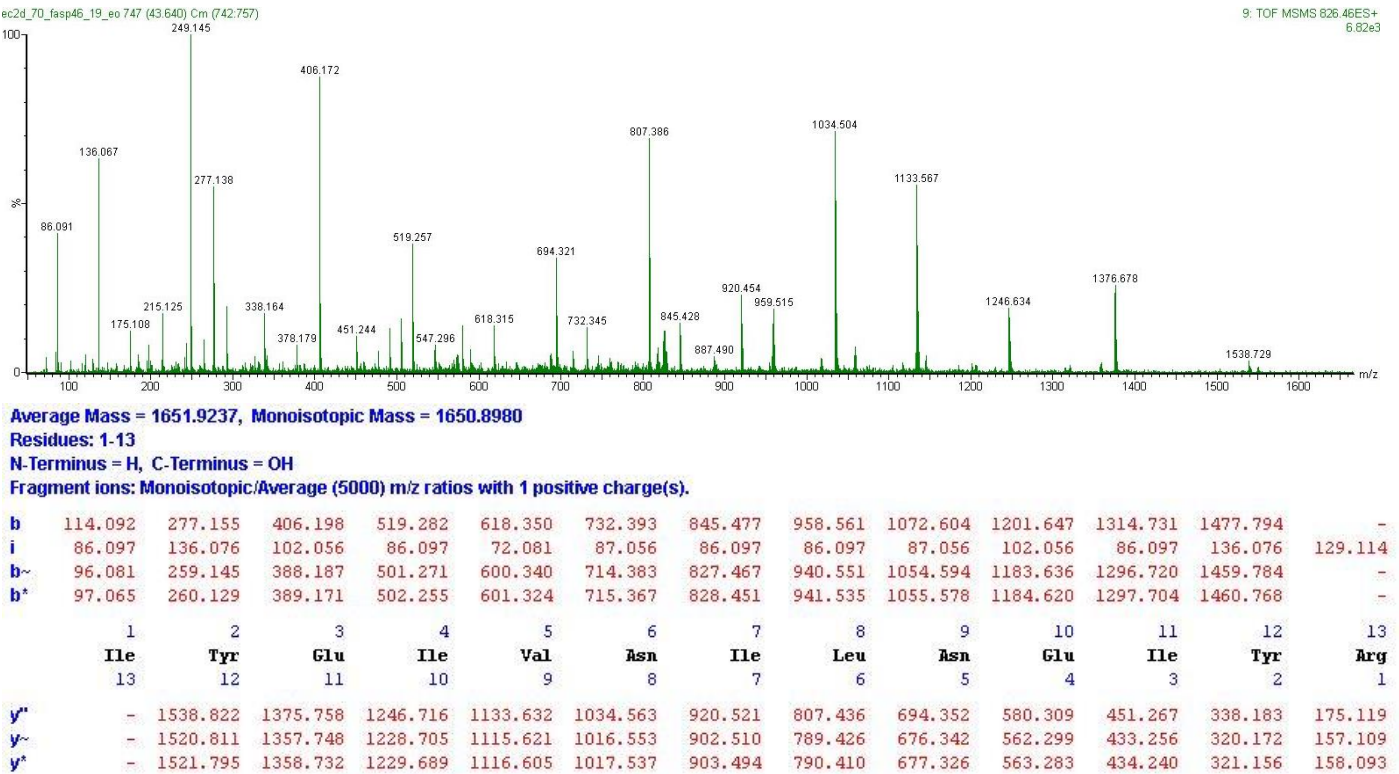

**Figure S3.** Fragment ion spectra and theoretical peptide fragment ions calculated using Masslynx software (Waters Corp.) for peptide measured in *E. ocellatus* venom digest using target MS/MS of the doubly-charged precursor. Match from metalloproteinase (Fragment), *E. coloratus*, E9JG63.

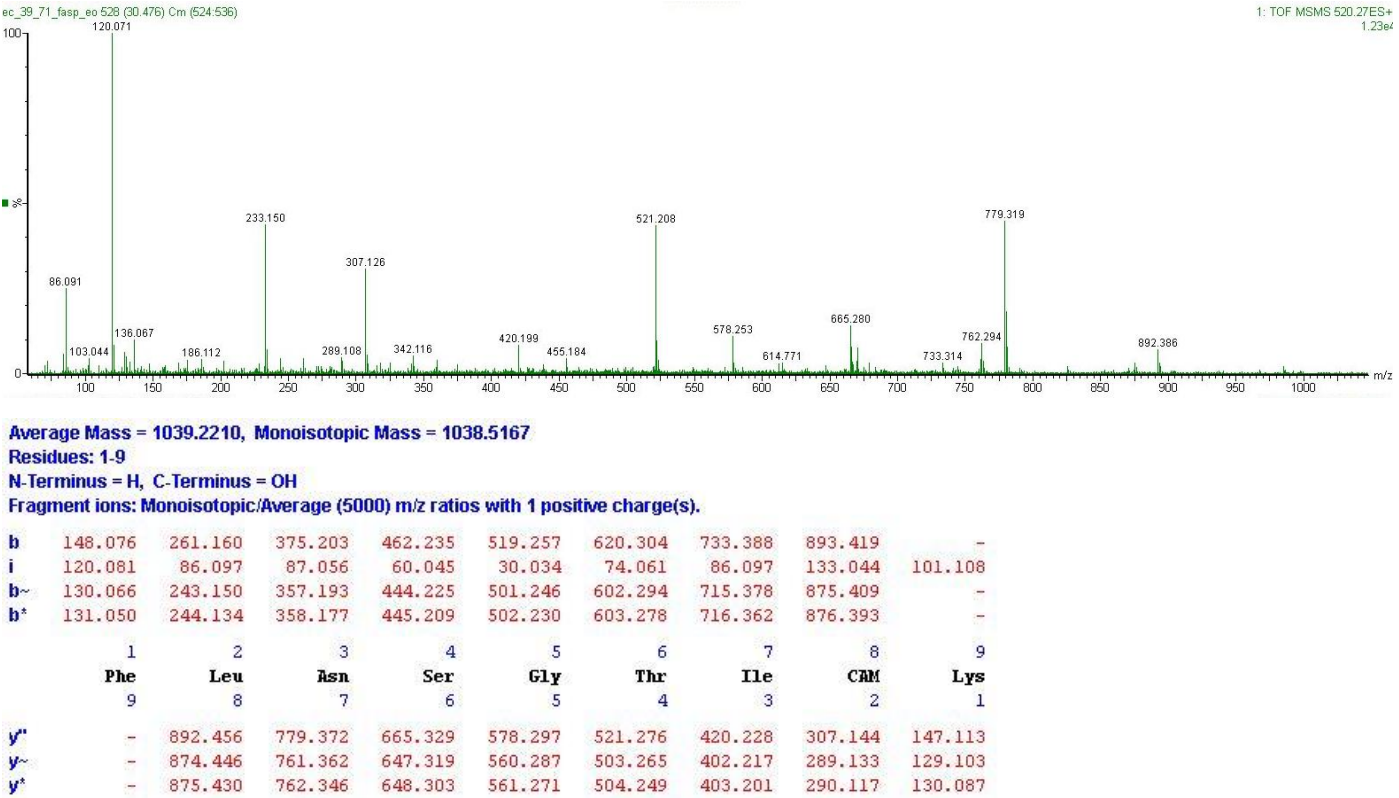

**Figure S4.** Fragment ion spectra and theoretical peptide fragment ions calculated using Masslynx software (Waters Corp.) for peptide measured in *E. ocellatus* venom digest using target MS/MS of the doubly-charged precursor. Match from disintegrin EO4A, *E. ocellatus*, Q3BER3.

CLUSTAL O(1.2.4) multiple sequence alignment

```

sp|R4NNL0|VMH3_VIPAA  MIQVLLVVIICLAVFPYQGSSIILESIGNVNDYEVVYLQKVTAMNKGAVKQPEQKYEDTMQY  60
sp|Q2UXR0|VM3E1_ECHOC  -MQVLLITISLAVLPYLGSSIILESIGVNDYEVVNPQKVTAMLKGAVKQPEQKYEDTMQY  59
                        :****: *.***:* * ***** * ***** * *****
                        :

sp|R4NNL0|VMH3_VIPAA  EFKVNGEPVILHLEKNKDLFSEDYSETHYSPDGREITNPPVEDHCYHGRIQNDADSTA  120
sp|Q2UXR0|VM3E1_ECHOC  EFKVKGEPPVVLHLEKNKGLFSEDYSETHYSPDGREITNPPVEDHCYHGRIQNDADSSA  119
                        ****:****:*****.*****
                        :

sp|R4NNL0|VMH3_VIPAA  SISACNGLKGHFQLRGETYFIEPLKIPDSEAHAVYKYENVEKEDEAPKTCGVTQTNWESD  180
sp|Q2UXR0|VM3E1_ECHOC  SISACNGLKGHFKLGRGEMFYFIEPLKIPDSEAHAVYKYENIEEEDAPKMGVKHTNRES  179
                        *****:**** *****:*.***** **.:** **
                        :

sp|R4NNL0|VMH3_VIPAA  ELIKKASQLNLTPEQQRYLNSPKYIKLVIVADYIMFLKYGRSLITIRTRIYEIVNLLNVI  240
sp|Q2UXR0|VM3E1_ECHOC  KSIKKASQLNLTPEQQRYLNTPKHIKVAIVADYLIFRKYGRNLFTIRAKIYEILNILNEI  239
                        : *****:*.***:*****:*. *****:*.***:*****:*.** *
                        :

sp|R4NNL0|VMH3_VIPAA  YRVLNIYIALVGLEIWNNGDKINVLPEAKVTLDLFGKWRETDLLNRRKHDNAQLLTGINF  300
sp|Q2UXR0|VM3E1_ECHOC  YKAFNIHVALVFLEIWSNGDKINLFPAANVTLDLFGKWRETDLMNRKNHDNTQLLTGMNF  299
                        *:..*:*:* ***.*****:.* *:***** **:*:*:*:*:*:*:*
                        :

sp|R4NNL0|VMH3_VIPAA  NGPTAGLGYLGSMCNPQYSAGIVQDHNKVNFLVALAMAHMGHNLGMDHDGIQCTCGAKS  360
sp|Q2UXR0|VM3E1_ECHOC  DGPTAGLGYVGTMCHPQFSAAVVQDHNKINFLVALAMAHELGHNLGMTHDEQFCTCGAKS  359
                        :*****:*.***:*.***:*****:*****:*****:***** ** *****
                        :

sp|R4NNL0|VMH3_VIPAA  CIMSGLTSCASIRFSNCSQEEHRKYLINKMPQCILNKPLKTDIVSPAVCGNYLVELGED  420
sp|Q2UXR0|VM3E1_ECHOC  CIMSATLSCGSGYRFSNCSREENRRYLINKMPQCILIKPSRTDIVSPVCGNSLVEVGED  419
                        ****.*****.* *****:*.***:***** ** :***** *** ***:***
                        :

sp|R4NNL0|VMH3_VIPAA  CDCGSPRDCQNPCNAATCKLTPGSQCADGECCDQCKFGRAGTVCRPANGCEDVSDVCTG  480
sp|Q2UXR0|VM3E1_ECHOC  CDCGSPGYCRNPCCNAATCKLTPGSQCADGECCDQCFTRAGTECRPARDECDKADLCTG  479
                        ***** *:*****:*****:*****:***** *** ***.*** :*:***
                        :

sp|R4NNL0|VMH3_VIPAA  QSAECPTDQFQRNGHPCQNNNGYCYNGTCPILGKQCISLFGASATVAQDACFQFNRLGNE  540
sp|Q2UXR0|VM3E1_ECHOC  QSAECPADQFQRNGQPCQNNNGYCYNGICPVMRNQCISLFGSRAIVAEDACFQFNSLGID  539
                        *****:*****:*****.***** **: :*****: * **:***** ** :
                        :

sp|R4NNL0|VMH3_VIPAA  YGYCRKENGRLKIPCAPQDVKCGRLYCFDNLPEHKNPCQIYYTPRDENKGMVDPGTCGDG  600
sp|Q2UXR0|VM3E1_ECHOC  YGYCRKENGRIKIPCAPEDVKCGRLYCFDNLPEHKNPCQIFYTPRDEDKGMVDPGTCENG  599
                        *****:*****:*****:*****:***** :*
                        :

```

sp|R4NNL0|VMH3\_VIPAA MACSSNGQ**CVDVNTAY** 616  
 sp|Q2UXR0|VM3E1\_ECHOC KVCII-NGK**CVDVNTAY** 614  
 . \* \*\* :\*\*\*\*\*

**Figure S5.** Clustal sequence alignment of R4NNL0 and Q2UXR0. Peptides, which were manually sequenced by target MS/MS in venom digests are labeled in red and bold, those obtained with DIA (score > 8) are labeled in blue and italic. Yellow indicates regions with a one-amino acid difference to the peptides validated in the venom digests.

|                        |                                                                         |     |
|------------------------|-------------------------------------------------------------------------|-----|
| tr E9JG63 E9JG63_ECHCO | -----                                                                   | 0   |
| sp Q2UXR0 VM3E1_ECHOC  | MQVLLITISLAVLPYLGSSIIIESGIVNDYEVVNPQKVTAMLKGAVKQPEQKYEDTMQYE            | 60  |
| tr E9JG63 E9JG63_ECHCO | -----HCYYHGHIQNADSFAS                                                   | 17  |
| sp Q2UXR0 VM3E1_ECHOC  | FKVKGEFPVVLHLEKNKGLFSEDYSETHYSPDGREITNPPVEDHCYYHGRIQNADSSAS             | 120 |
|                        | *****:***** **                                                          |     |
| tr E9JG63 E9JG63_ECHCO | ISACNGLKGHFKLGRGMYFIEPLKIPDSEAHAVYKYENVEKEDEAPKMGCVTQTNWESDE            | 77  |
| sp Q2UXR0 VM3E1_ECHOC  | ISACNGLKGHFKLGRGMYFIEPLKIPDSEAHAVYKYENIEEDEAPKMGCVKHTNRES DK            | 180 |
|                        | *****:*****:*** **:                                                     |     |
| tr E9JG63 E9JG63_ECHCO | PIKEASQLNLTPEQQRYLNSQKYIKVAIVADYIMFRKYGRNLTIRAR <b>IYEIVNINLEIY</b>     | 137 |
| sp Q2UXR0 VM3E1_ECHOC  | SIKKASQLNLTPEQQRYLNTPKHIKVAIVADYLIFRKYGRNLTIRAK <b>IYEILNINLEIY</b>     | 240 |
|                        | ** :*****: * :*****: :*****:****:*****                                  |     |
| tr E9JG63 E9JG63_ECHCO | <b>R</b> AFNIHVALVFLEIWSNGDKINVLPEAKVTLDLFGEWQRDLLNRKKHDNAQLLTGINFD     | 197 |
| sp Q2UXR0 VM3E1_ECHOC  | KAFNIHVALVFLEIWSNGDKINLFPAAVNTLDLFGKWRE RDLNMRKNHDNTQLLTGMNFD           | 300 |
|                        | :*****: :* *:*****: **:***:***:***:*****:***                            |     |
| tr E9JG63 E9JG63_ECHCO | GPTAGLGYVGS LCHPQYSAAIVQDHNKINFLVALAMAHELGHN LGMTHDEXFCTCGAKSC          | 257 |
| sp Q2UXR0 VM3E1_ECHOC  | GPTAGLGYVGT MCHPQFSAAVVQDHNKINFLVALAMAHELGHN LGMTHDEQFCTCGAKSC          | 360 |
|                        | *****: :***:***:*****:***** *****                                       |     |
| tr E9JG63 E9JG63_ECHCO | IMSGT LSCGYSYRFSNCSQEENRRYFINKMPQCILNKPLKTDIVSPAVCGNYLVEVGEDC           | 317 |
| sp Q2UXR0 VM3E1_ECHOC  | IMSAT LSCGYSYRFSNCSREENRRYLIN KMPQCILIKPSRTDIVSPVCGNSLVEVGEDC           | 420 |
|                        | ***.*****:*****:***** ** :***** **** *****                              |     |
| tr E9JG63 E9JG63_ECHCO | DCGSPAN CHN PCCNAATCXLT PGSQCAEGEC CDQCRFTRAGTECRPARDECDKADLCTGQ        | 377 |
| sp Q2UXR0 VM3E1_ECHOC  | DCGSPGYCRN PCCNAATCK <b>LTPGSQCADGEC CDQCR</b> FTRAGTECRPARDECDKADLCTGQ | 480 |
|                        | *****. *:***** *****:***** *****                                        |     |
| tr E9JG63 E9JG63_ECHCO | SAECPADQFQRNGQPCQNNNGYCYNGICPIMRNQCILLFGSRATVAEDACFQFNSLGSDY            | 437 |
| sp Q2UXR0 VM3E1_ECHOC  | SAECPADQFQRNGQPCQNNSGYCYNGICPVMRNQCISLFGSRAIVAEDACFQFNSLGIDY            | 540 |
|                        | *****.*****:***** ***** *****                                           |     |



tr|E9JG63|E9JG63\_ECHCO

GYCRKENGGR***IPCAPE******LDV***CGR***LYCF******DN******LE******PH***KNPCQIVYTPSDEDEKGMVDPGTCEDGK

497

sp|Q2UXR0|VM3E1\_ECHOC

GYCRKENGGR***IPCAPE******LDV***CGR***LYCF******DN******LE******PH***KNPCQIFYTPRDEDEKGMVDPGTCENGK

600

\*\*\*\*\*.\*\*\*\*\*\*\*\*.\*\*\*

tr|E9JG63|E9JG63\_ECHCO

VCINGK***CVDVNTAY***

511

sp|Q2UXR0|VM3E1\_ECHOC

VCINGK***CVDVNTAY***

614

\*\*\*\*\*

**Figure S6.** Clustal sequence alignment of E9JG63 and Q2UXR0. Peptides, which were manually sequenced by target MS/MS in venom digests are labeled in red and bold, those obtained with DIA (score > 8) are labeled in blue and italic. Yellow indicates regions with a one-amino acid difference to the peptides validated in the venom digests.

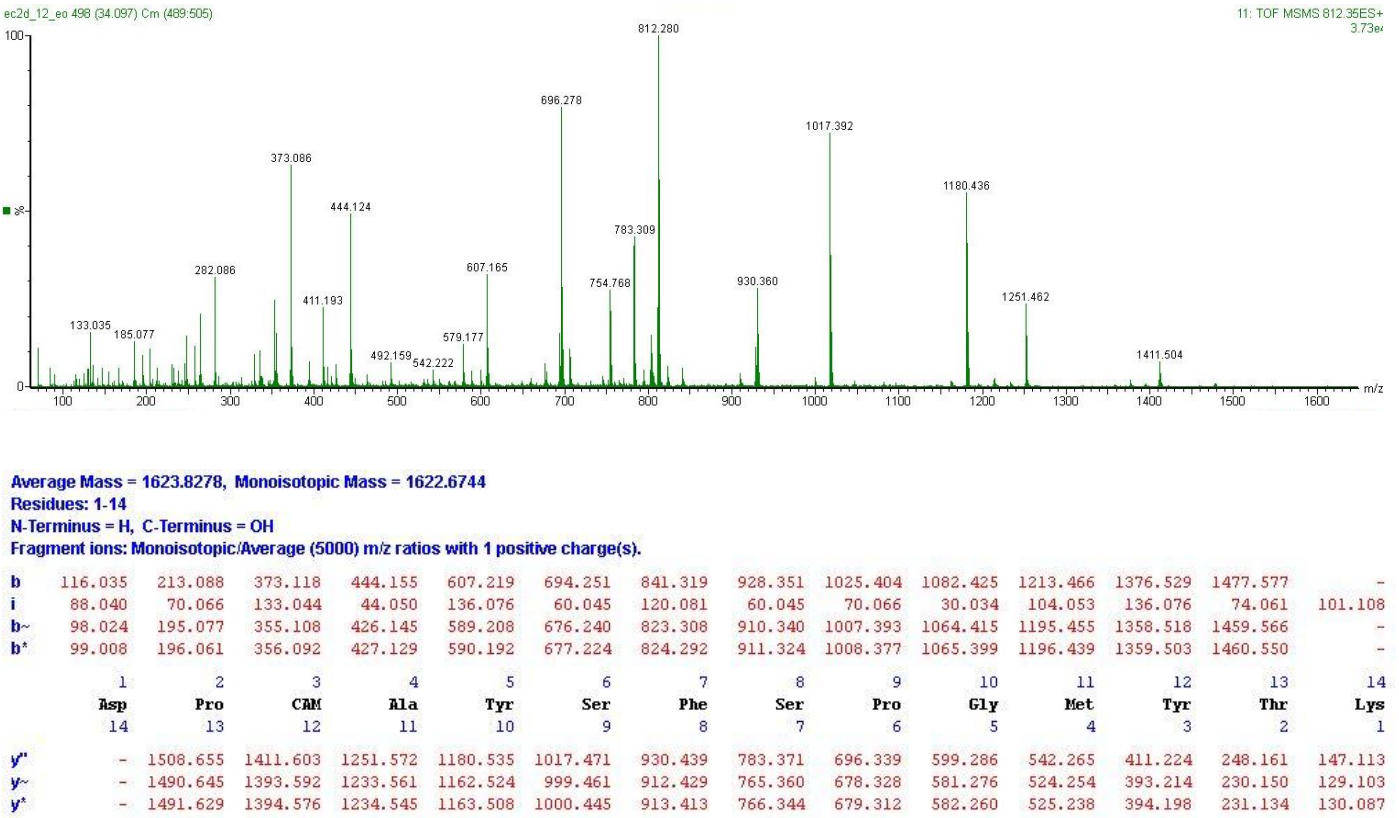

**Figure S7.** Fragment ion spectra and theoretical peptide fragment ions calculated using Masslynx software (Waters Corp.) for peptide measured in *E. ocellatus* venom digest using target MS/MS o the doubly-charged precursor. Match from serine protease (fragment, *E. ocellatus*, D5KRX9).

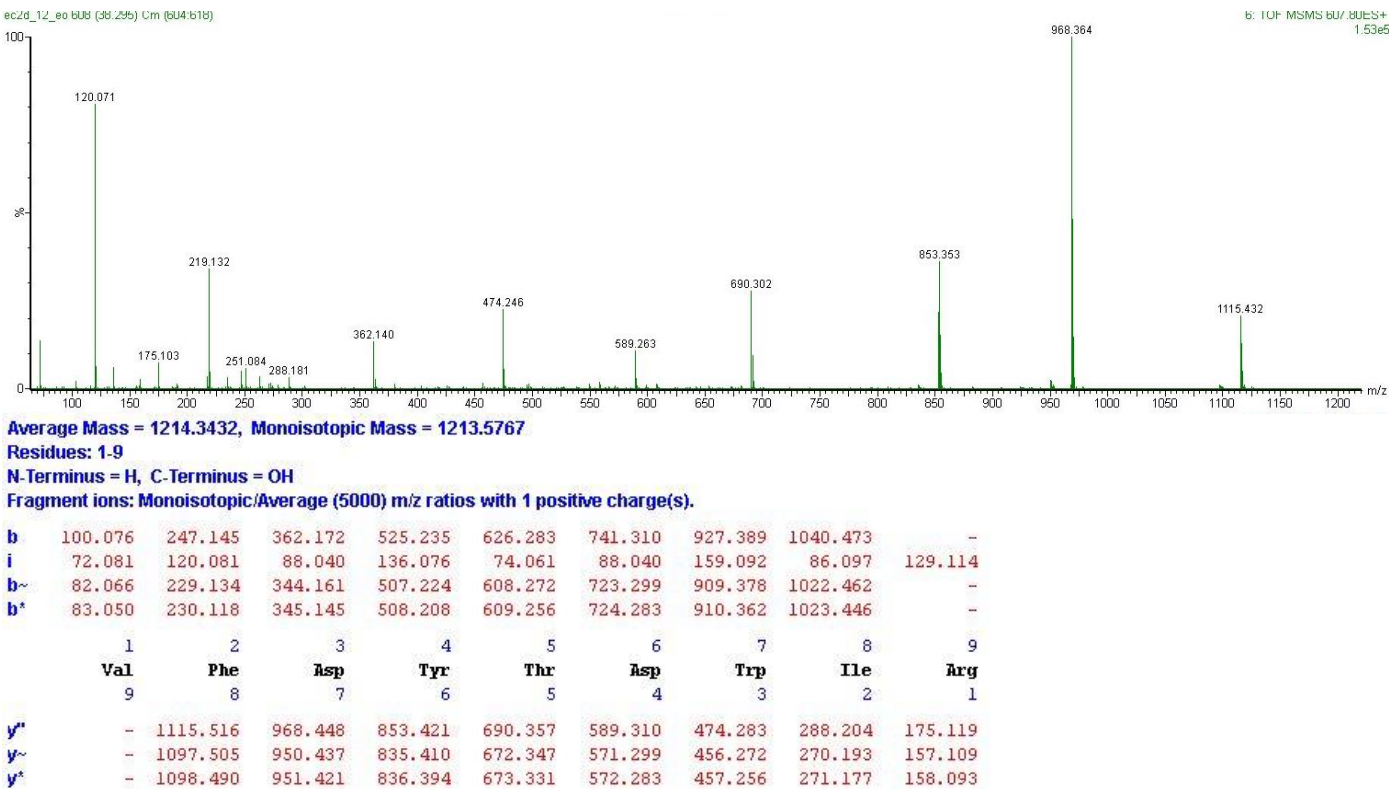

Figure S8. Fragment ion spectra and theoretical peptide fragment ions calculated using Masslynx software (Waters Corp.) for peptide measured in *E. ocellatus* venom digest using target MS/MS o the doubly-charged precursor. Match from serine protease (fragment, *E. ocellatus*, D5KRX9).

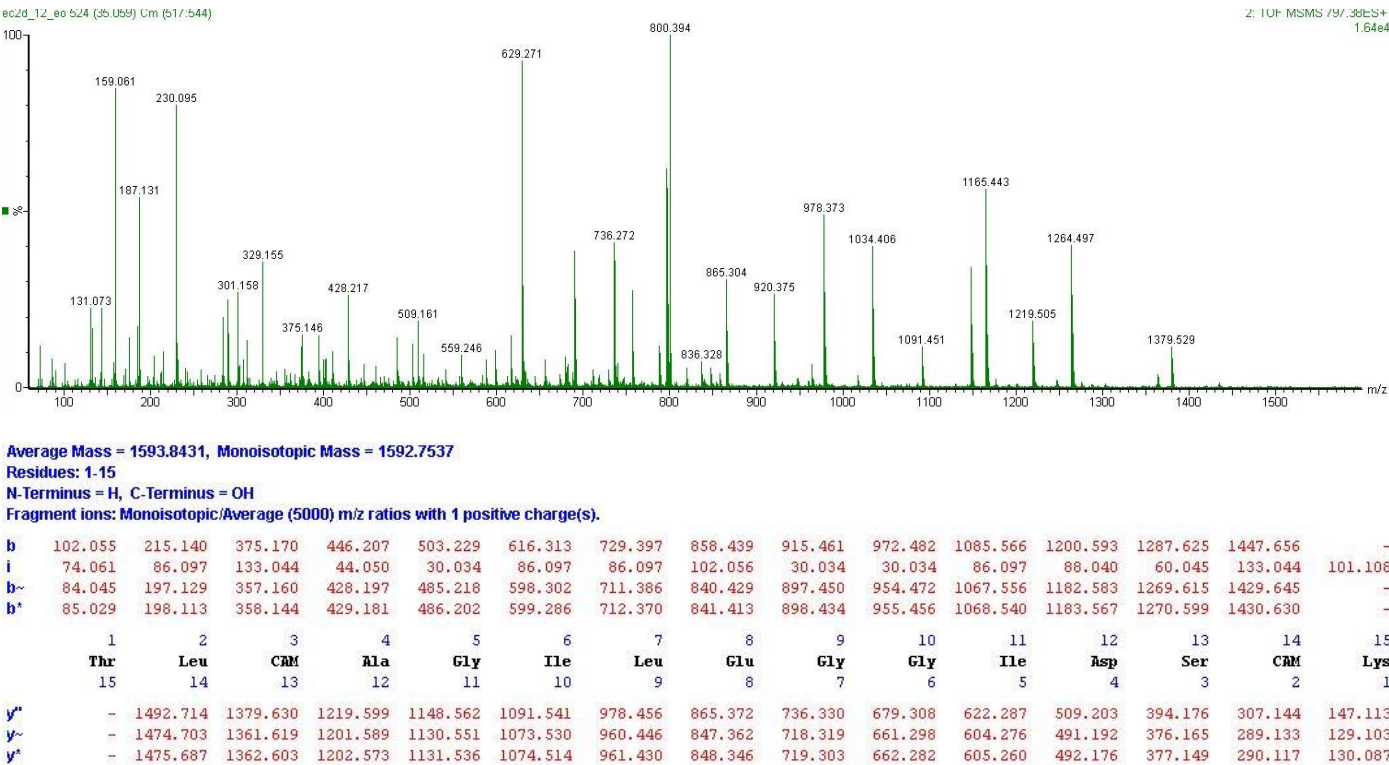

Figure S9. Fragment ion spectra and theoretical peptide fragment ions calculated using Masslynx software (Waters Corp.) for peptide measured in *E. ocellatus* (top trace) venom digest using target MS/MS o the doubly-charged precursor. Match from serine protease (fragment, *E. ocellatus*, D5KRY1).

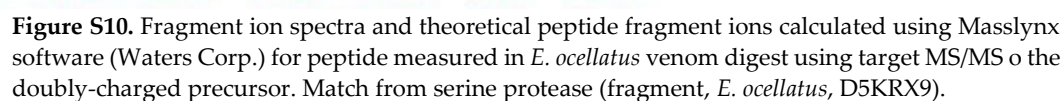



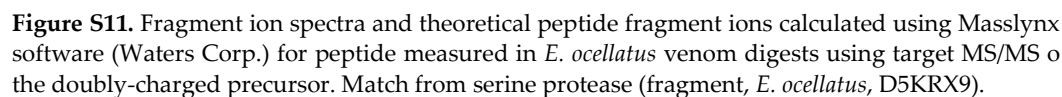

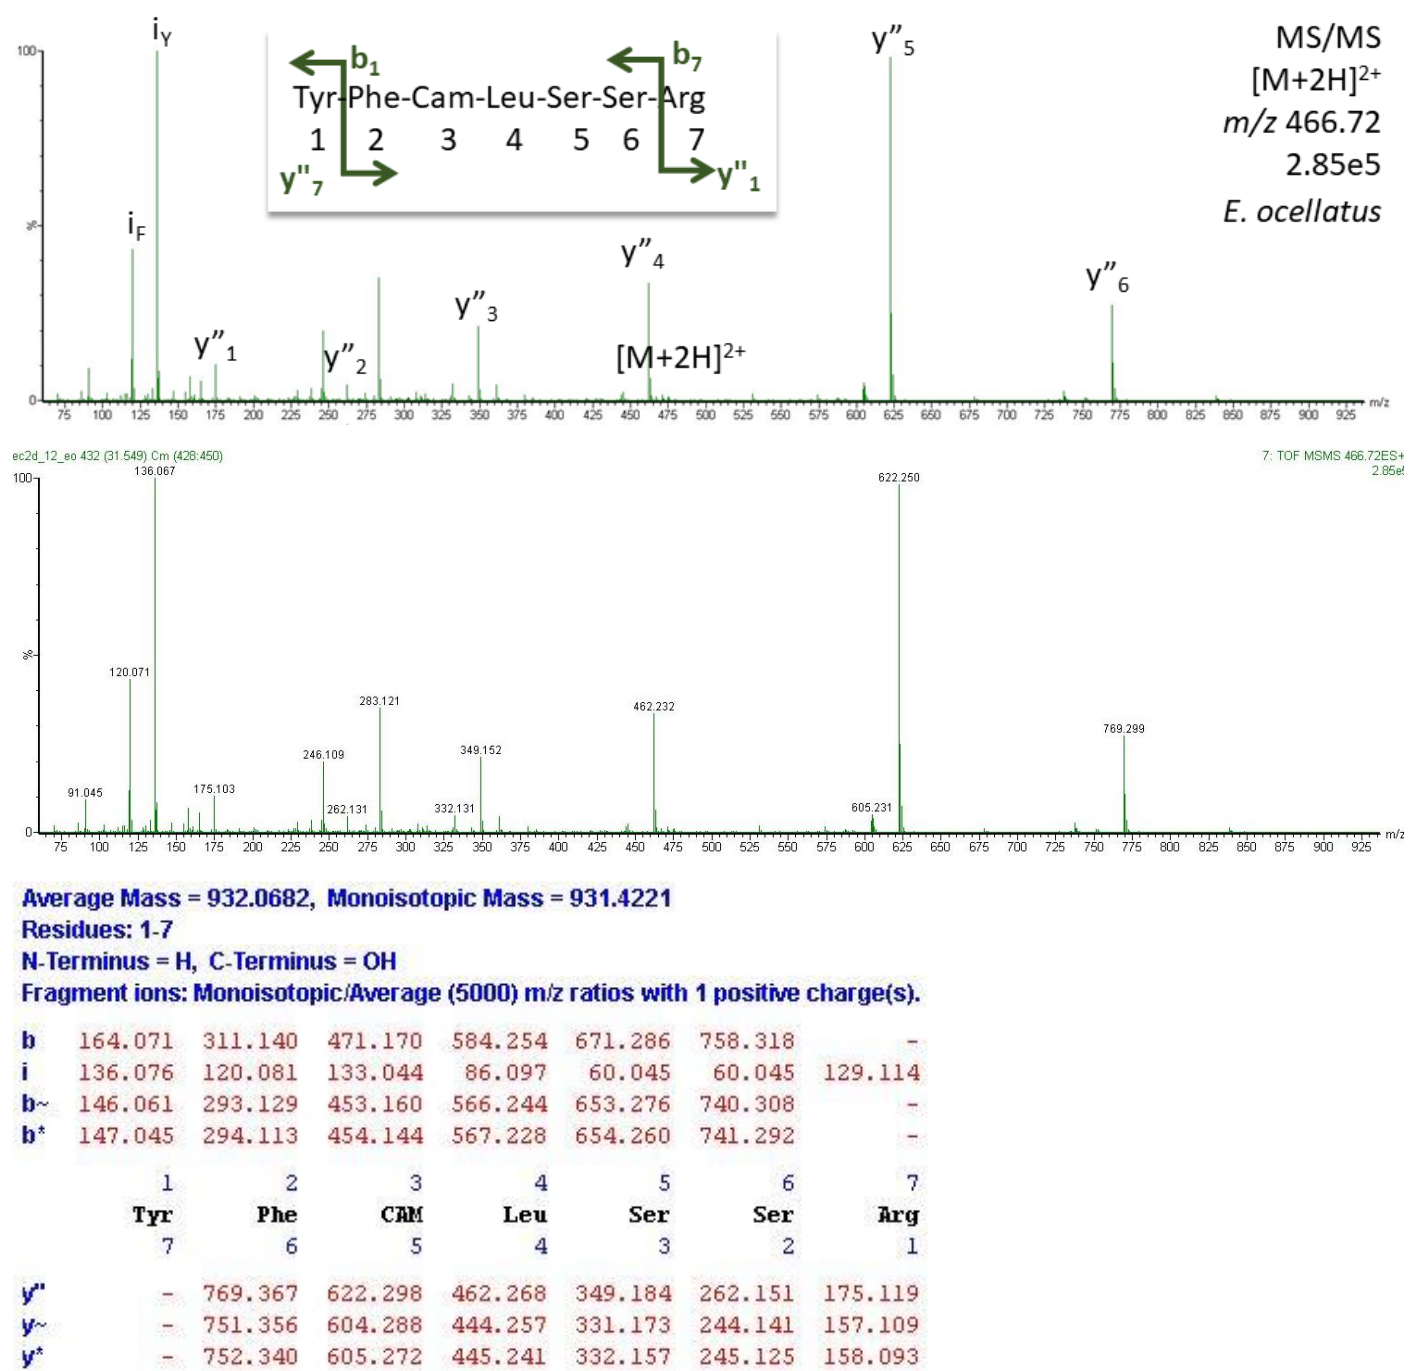

**Figure S12.** Fragment ion spectra and theoretical peptide fragment ions calculated using Masslynx software (Waters Corp.) for peptide measured in *E. ocellatus* venom digest using target MS/MS o the doubly-charged precursor. Match from serine protease (fragment, *E. ocellatus*, D5KRX9).

## CLUSTAL 2.1 multiple sequence alignment

```

tr|D5KRX9|D5KRX9_ECHOC      MVLIRVLANLLLLQLSYAQTSSSELVIGGDECNINEHRSLVFLYNASG--F
tr|D5KRY1|D5KRY1_ECHOC      MVLIRVLANLLVLQLSYAQKSSELVAGGAECDKNEHPFLVALHTARSKRF
                                *****:*****.***** ** **: ***  ** *:.* .  *

tr|D5KRX9|D5KRX9_ECHOC      ECCGTLLNREWVLSAAHCDMENMEIYLGMHNLSPNPQDARRRDPEEKYFC
tr|D5KRY1|D5KRY1_ECHOC      HCTGTLLIGKQWVLTAARCNKKNIRVKIGMHNKNERTEDEMMRVAAEKFFC
                                .* ***:.:***:***:*. :*:.. :***** .: .:*  * . **:**

tr|D5KRX9|D5KRX9_ECHOC      LSSRTYTKWDKDIMLIKLDSPVTYSTHIAPFSLPSRPPTVGSVCRIMGWG
tr|D5KRY1|D5KRY1_ECHOC      ASSKTYTRWDKDIMLIKLKRPVNNRTHIAPLSLSPNPASVGSECRIMGWG
                                **:***:*****. **. *****:****.*.:*** *****

tr|D5KRX9|D5KRX9_ECHOC      GIPSPNETYTPDVPHCANINILRYSVCRSTYWYELLPAQSRALCAGDRRRR
tr|D5KRY1|D5KRY1_ECHOC      TTTTTKVTYPDVPCANIKIFDYSVCR--EAYRKLPEKSRTLCAGILEGG
                                .:..: *****:***:*. *****  * . ** :*:***** .

tr|D5KRX9|D5KRX9_ECHOC      IGCKGDSGGPLICNGQIHGIVSWSRDPCAYSFSPGMYTKVFDYTDWIRS
tr|D5KRY1|D5KRY1_ECHOC      IDSCKADTGGPLICNGEFQGIASWGGQPCAQPLKPALYTNVFDYSDWIKS
                                *.***.*:*****:..**.*. :*** .:.*.**:*****:***:*

tr|D5KRX9|D5KRX9_ECHOC      IIAGNTTATAP--
tr|D5KRY1|D5KRY1_ECHOC      IIAGNTTATCPPS
                                *****.*

```

**Figure S13.** Clustal sequence alignment of D5KRX9 and D5KRY1. Peptides, which were manually sequenced by target MS/MS in venom digests are labeled in red and bold, those obtained with DIA (score > 8) are labeled in blue and italic.

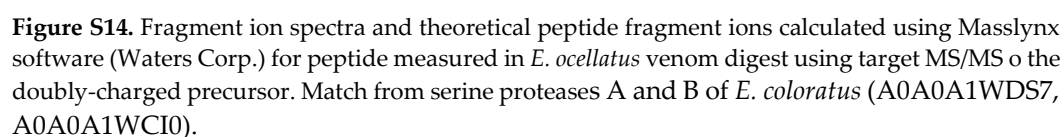

## CLUSTAL 2.1 multiple sequence alignment

```

sp|B5U6Y3|VSP_ECHOC          MVLIRVLANLLVLQLSYAQMSSELVVGGEENRNRHRSLLALYNSS--GT
tr|A0A0A1WDS7|A0A0A1WDS7_ECHCO -----GGAECNINEHRSLALIYNSTSMWF
                                   **.*** *.*****:***:

sp|B5U6Y3|VSP_ECHOC          LCGGTLIHEEWVLSAAHCDMENMKIYLGHLNLSLPNKDQQKREPRETHFC
tr|A0A0A1WDS7|A0A0A1WDS7_ECHCO HCSGTLLNQEWVLTAAHCENMNIYLGVHNKTKRNKDQQKRFPKKKYFC
                                   *.***:::****:****:****:****:*** :  ***** *:.:**

sp|B5U6Y3|VSP_ECHOC          LPSRNYTLWDKDIMLIKLNRPVNNSPHIAPISLPSNPPRLRSVCHIMGWG
tr|A0A0A1WDS7|A0A0A1WDS7_ECHCO LKSKNFTLWDKDIMLI-----
                                   * *:*:*****

sp|B5U6Y3|VSP_ECHOC          AITSPNETYPDVPFCANINILRYSVCRAAFGRLLPAQSRTLCAgilRGgID
tr|A0A0A1WDS7|A0A0A1WDS7_ECHCO -----

sp|B5U6Y3|VSP_ECHOC          TCLGDSGGPLICNGQIQGIVSWGAEVCAKPHAPGLYTKVSDYTDWIQSII
tr|A0A0A1WDS7|A0A0A1WDS7_ECHCO -----

```

**Figure S15.** Clustal sequence alignment of B5U6Y3 and A0A0A1WDS7. The peptide, which was manually sequenced by target MS/MS in venom digests is labeled in red and bold.
